# Supplementary material for: A concentration dependent auto-relay-recognition by the same analyte: a dual fluorescence switch-on by hydrogen sulfide via Michael addition followed by reduction and staining for bio-activity
Source: Royal Society of Chemistry journal article supplement (doi:10.1039/c5ob02008e), 2015-10-15
Supplement: c5ob02008e1.pdf [file c5ob02008e1.pdf]

# **Concentration dependent auto-relay-recognition by same analyte: Dual fluorescence switch-on by hydrogen sulfide via Michael addition followed by reduction and staining bio-activity**

Avijit Kumar Das,<sup>a</sup> Shyamaprosad Goswami,<sup>\*a</sup> Gorachand Dutta,<sup>b</sup> Sibaprasad Maity,<sup>c</sup> Tarun kanti Mandal,<sup>c</sup> Kalyani Khanra,<sup>d</sup> Nandan Bhattacharyya<sup>d</sup>

<sup>a</sup>Department of Chemistry, Indian Institute of Engineering Science and Technology, Shibpur, West Bengal, India.

<sup>b</sup>Pusan National University, Busan 609-735, Korea, <sup>c</sup>Haldia Institute of Technology, Haldia. <sup>d</sup>Panskura Banamali College, Panskura.

|                                                                                              |              |
|----------------------------------------------------------------------------------------------|--------------|
| <b>1. Calculation of the detection limit .....</b>                                           | <b>2</b>     |
| <b>2. pH titration.....</b>                                                                  | <b>3</b>     |
| <b>3. MTT assay.....</b>                                                                     | <b>3-4</b>   |
| <b>4. Kinetics study.....</b>                                                                | <b>5</b>     |
| <b>5. Reversibility test.....</b>                                                            | <b>6</b>     |
| <b>6. Characterization spectra of PND (<sup>1</sup>H-NMR, HRMS, <sup>13</sup>C-NMR).....</b> | <b>7-9</b>   |
| <b>7. HRMS spectra of PND with H<sub>2</sub>S at different concentrations.....</b>           | <b>10</b>    |
| <b>8. Theoretical Study.....</b>                                                             | <b>11-17</b> |

### Calculation of the detection limit:

The detection limit (DL) of **PND** in emission spectra for  $\text{H}_2\text{S}$  was determined from the following equation<sup>1</sup>:

$$\text{DL} = K * \text{Sb1}/S$$

Where  $K = 2$  or  $3$  (we take  $2$  in this case);  $\text{Sb1}$  is the standard deviation of the blank solution;  $S$  is the slope of the calibration curve.

From the graph Fig.S2(a), we get slope =  $32.252$ , and  $\text{Sb1}$  value is  $12.494$ .

Thus using the formula we have detected the blue fluorescence of **PND** using minimum  $0.77 \mu\text{M}$   $\text{H}_2\text{S}$ .

From the graph Fig.S2(b), we get slope =  $38.27325$ , and  $\text{Sb1}$  value is  $49.659$ .

Thus using the formula we have detected the green fluorescence of **PND** using minimum  $13.19 \mu\text{M}$   $\text{H}_2\text{S}$ .

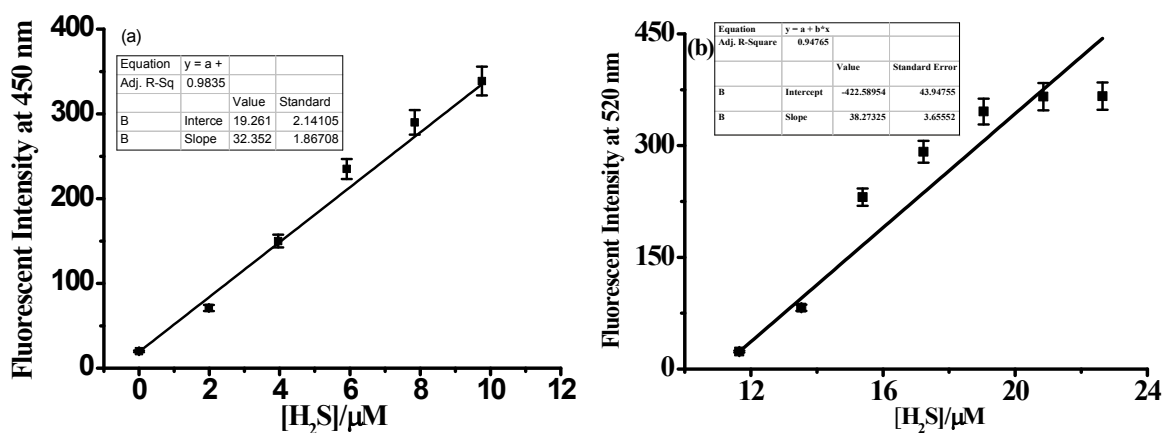

**Figure S1 (a)** Changes of emission intensity of **PND** ( $c = 2 \times 10^{-5}\text{M}$ ) as a function of  $[\text{H}_2\text{S}]$ ( $c = 4 \times 10^{-4}\text{M}$ ) at 450 nm. **(b)** Changes of emission intensity of **PND** ( $c = 2 \times 10^{-5}\text{M}$ ) as a function of  $[\text{H}_2\text{S}]$ ( $c = 4 \times 10^{-4}\text{M}$ ) at 520 nm.

## pH Titration:

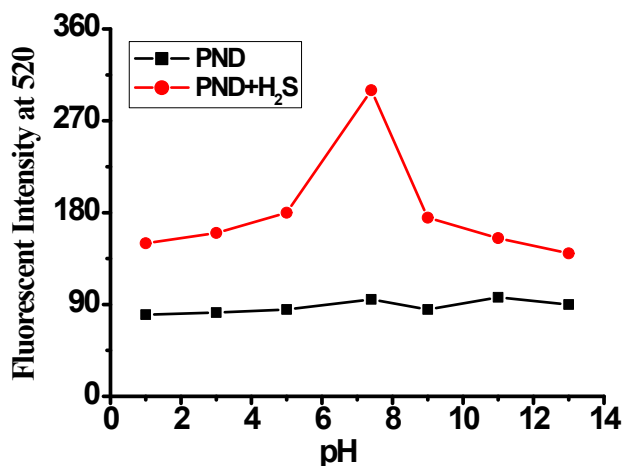

**Figure S<sub>2</sub>:** The effect of pH on the fluorescence intensity changes of **PND** ( $c = 2 \times 10^{-5}$  M) in presence and absence of H<sub>2</sub>S ( $c = 4 \times 10^{-4}$  M).

## MTT assay:

Cytotoxicity of a **PND** was measured by MTT assay. MCF-7 cells were seeded in 96-well tissue culture plate. After 24 hrs of cell seeding, **PND** ( $5 \times 10^{-5}$  M) mixed with different concentrations of H<sub>2</sub>S ( $5 \times 10^{-5}$  to  $4 \times 10^{-4}$  M) were added to the culture medium. Cells were incubated for 24 hrs at 37°C and then subjected to tetrazolium salt 3-[4, 5-dimethylthiazol-2-yl]-2, 5-diphenyltetrazolium bromide (MTT) colorimetric assay (1). The yellow tetrazolium MTT (3-(4, 5-dimethylthiazolyl-2)-2, 5-diphenyltetrazolium bromide) is reduced by live cells, and forms a purple color after dissolved in DMSO and intensity of purple color is proportionate with number of live cells which will be quantified by optical density measured in UV VIS spectrophotometer. The color changes were measured using a ELISA reader (Robonik, Readwell touch ELISA PLATE analyzer, India). The rate of survival of cells were calculated by using the

following formulae: Cell viability (%) =  $(1 - \text{ODA}_1 / \text{OD A}_0) / 100$ , where  $A_0$  = Absorbency of control cells and  $A_1$  = Absorbency of treated cells.

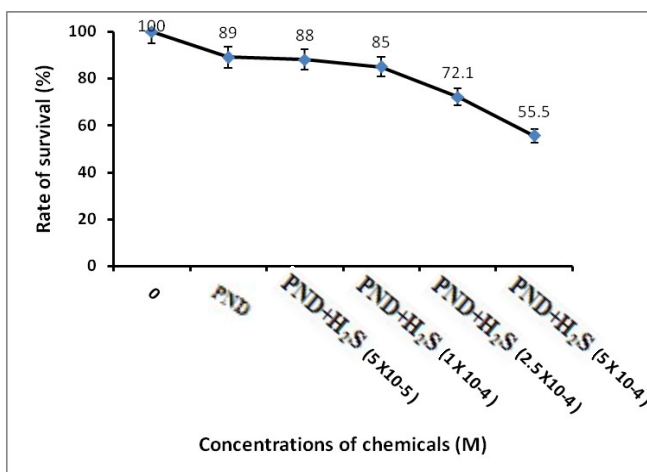

**Figure S<sub>3</sub>:** The rate of survival of cells with different concentrations of H<sub>2</sub>S added to **PND** - incubated cell. The results are derived from three different experiments (SD<5).

The results of cytotoxicity indicate that with increasing concentrations of H<sub>2</sub>S, rate of cell death were also increased indicating that H<sub>2</sub>S generated after reaction with **PND** and H<sub>2</sub>S is relatively toxic for MCF-7 cell line. The rate of survival at 5x10<sup>-5</sup>M **PND** is 89% i.e **PND** alone can cause 11% cell death. When H<sub>2</sub>S is added at 5x10<sup>-4</sup>M concentration, in combination of **PND** (5x10<sup>-5</sup>M), the cell death increases upto 34%. Therefore, the photograph was taken at lower concentration of H<sub>2</sub>S (2x10<sup>-4</sup>M).

### Kinetics study:

The changes of emission intensity of PND( $c = 2 \times 10^{-5} \text{M}$ ) at different time interval by addition of  $\text{H}_2\text{S}$ ( $c = 4 \times 10^{-4}$ ) and calculation of first order rate constant:

Fig.S<sub>4</sub> (a) represents the changes of emission intensity at wavelength 450 nm at different time interval by addition of  $\text{H}_2\text{S}$ . **Inset:** From the time vs. emission intensity plot (Fig.S<sub>4</sub>(a)) at fixed wavelength at 450 nm by using first order rate equation we get the rate constant  $K = \text{slope} \times 2.303 = 0.009 \times 2.303 = 2.07 \times 10^{-2} \text{ Sec}^{-1}$ .

Fig.S<sub>4</sub> (b) represents the changes of emission intensity at wavelength 520 nm at different time interval by addition of  $\text{H}_2\text{S}$ . **Inset:** From the time vs. emission intensity plot (Fig.S<sub>4</sub>(b)) at fixed wavelength at 520 nm by using first order rate equation we get the rate constant  $K = \text{slope} \times 2.303 = 0.015 \times 2.303 = 3.45 \times 10^{-2} \text{ Sec}^{-1}$ .

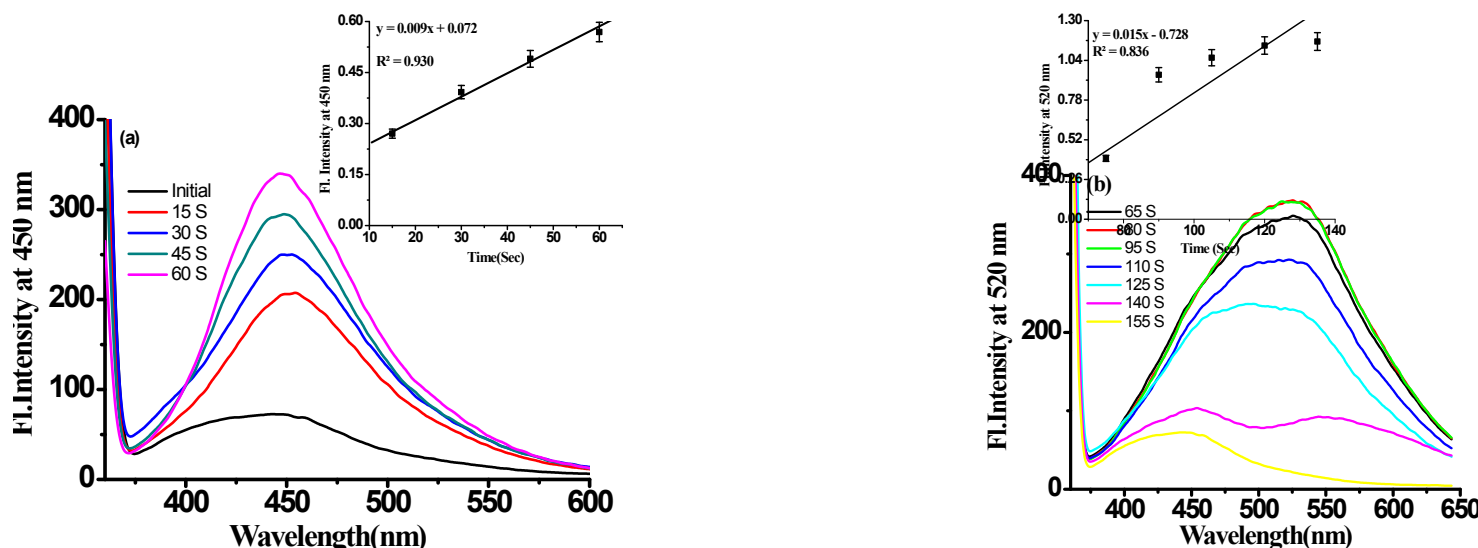

**Figure S<sub>4</sub> (a):** The changes of emission spectra at 450 nm wavelength at different time intervals of PND in presence of  $\text{H}_2\text{S}$  in  $\text{CH}_3\text{CN}$ : HEPES buffer solution  $\text{CH}_3\text{CN}$ -HEPES buffer (50/50, v/v, 25°C) at pH 7.4. **Left inset:** Changes of emission intensity at different time intervals ('S' denotes Second). **Right inset:** The first order rate equation by using Time vs. fluorescent intensity plot at 450 nm. **(b)** The changes of emission spectra at different time intervals of PND in presence of  $\text{H}_2\text{S}$  in  $\text{CH}_3\text{CN}$ : HEPES buffer solution  $\text{CH}_3\text{CN}$ -HEPES buffer (50/50, v/v, 25°C) at pH 7.4. **Left inset:** Changes of emission intensity at different time intervals ('S' denotes Second). **Right inset:** The first order rate equation by using Time vs. fluorescent intensity plot at 520 nm.

Fluorescence spectra of PNDH (PND+H<sub>2</sub>S) with external oxidizing agent OCl<sup>-</sup> (Reversibility test).

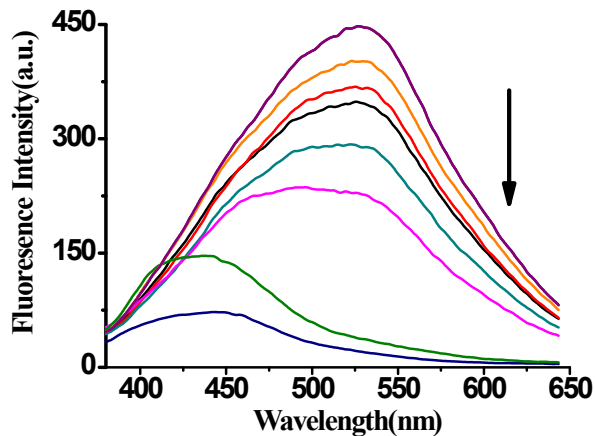

**Figure S<sub>5</sub>.** Fluorescence spectra of PNDH (PND+H<sub>2</sub>S) ( $c = 2 \times 10^{-5} \text{M}$ ) with OCl<sup>-</sup> ( $c = 4 \times 10^{-4} \text{M}$ ) in CH<sub>3</sub>CN: HEPES buffer solution (50:50, v:v) at pH 7.4.

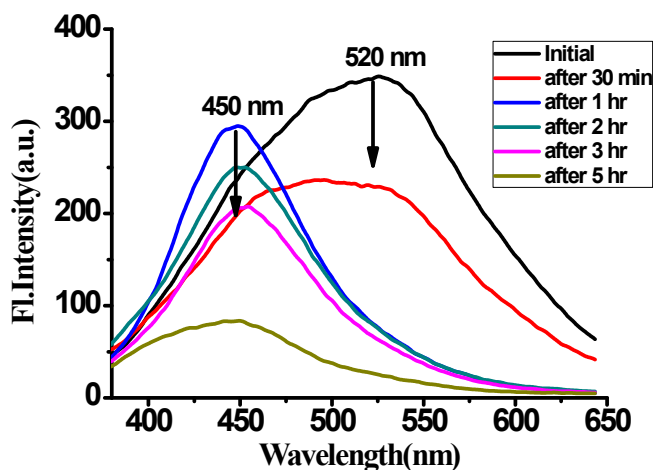

**Figure S<sub>6</sub>.** Fluorescence intensity changes of the resulting solution of PNDH (PND+H<sub>2</sub>S) ( $c = 2 \times 10^{-5} \text{M}$ ) on staying the solution in open air at different time intervals in CH<sub>3</sub>CN: HEPES buffer solution (50:50, v:v) at pH 7.4.

**<sup>1</sup>H NMR spectra (S<sub>7</sub>) of PND:**

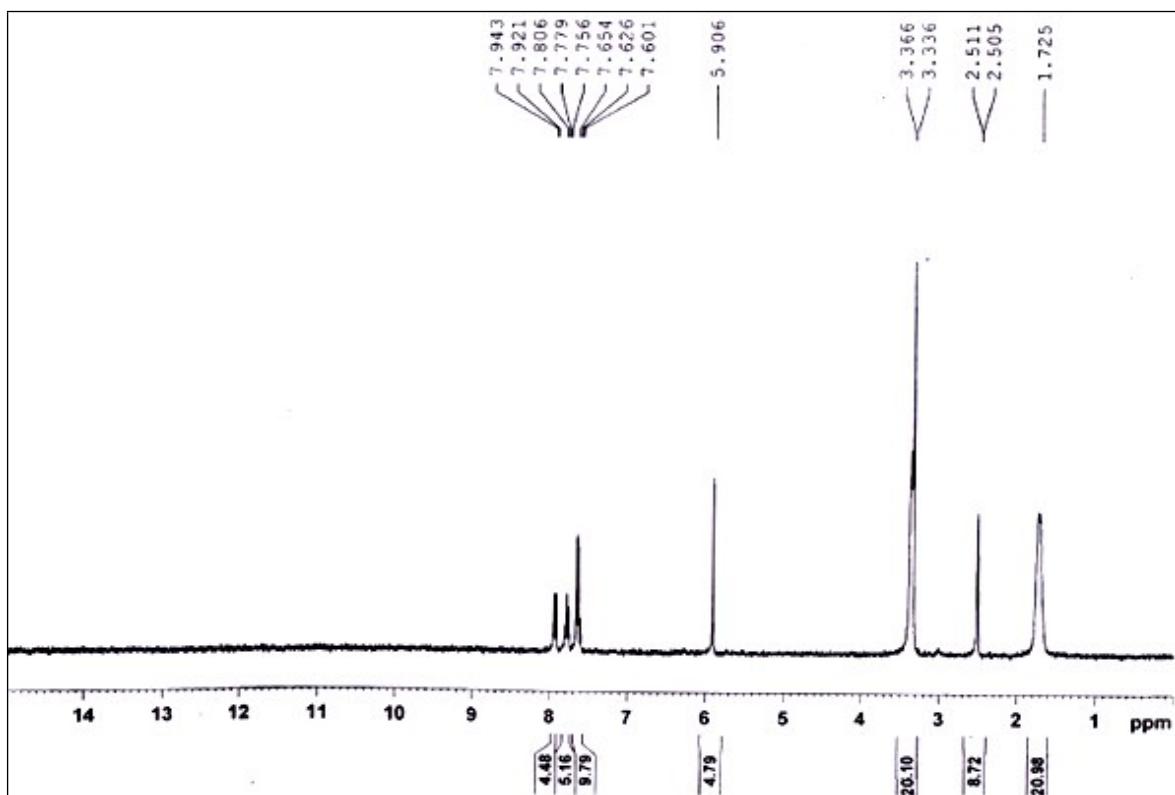

# Mass spectra (S<sub>8</sub>) of PND:

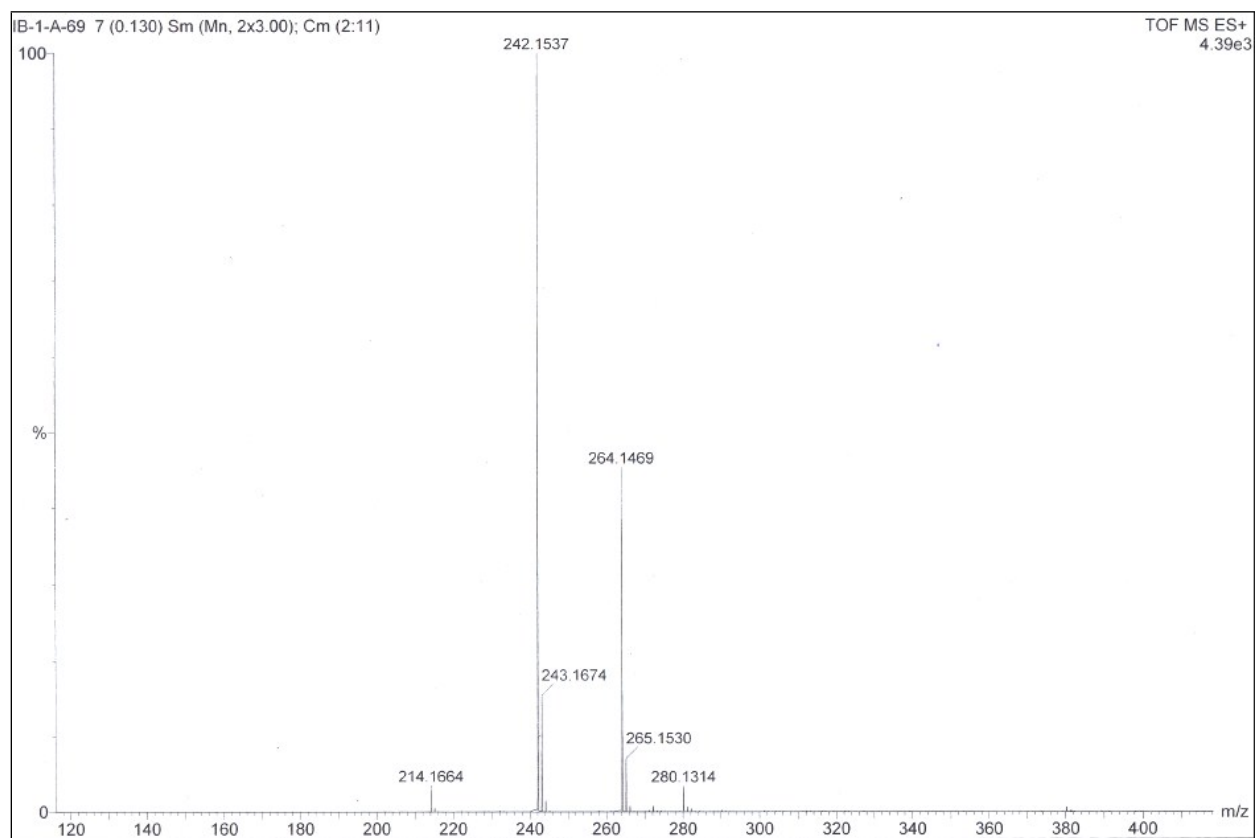



**$^{13}\text{C}$  NMR spectra ( $S_0$ ) of PND:**

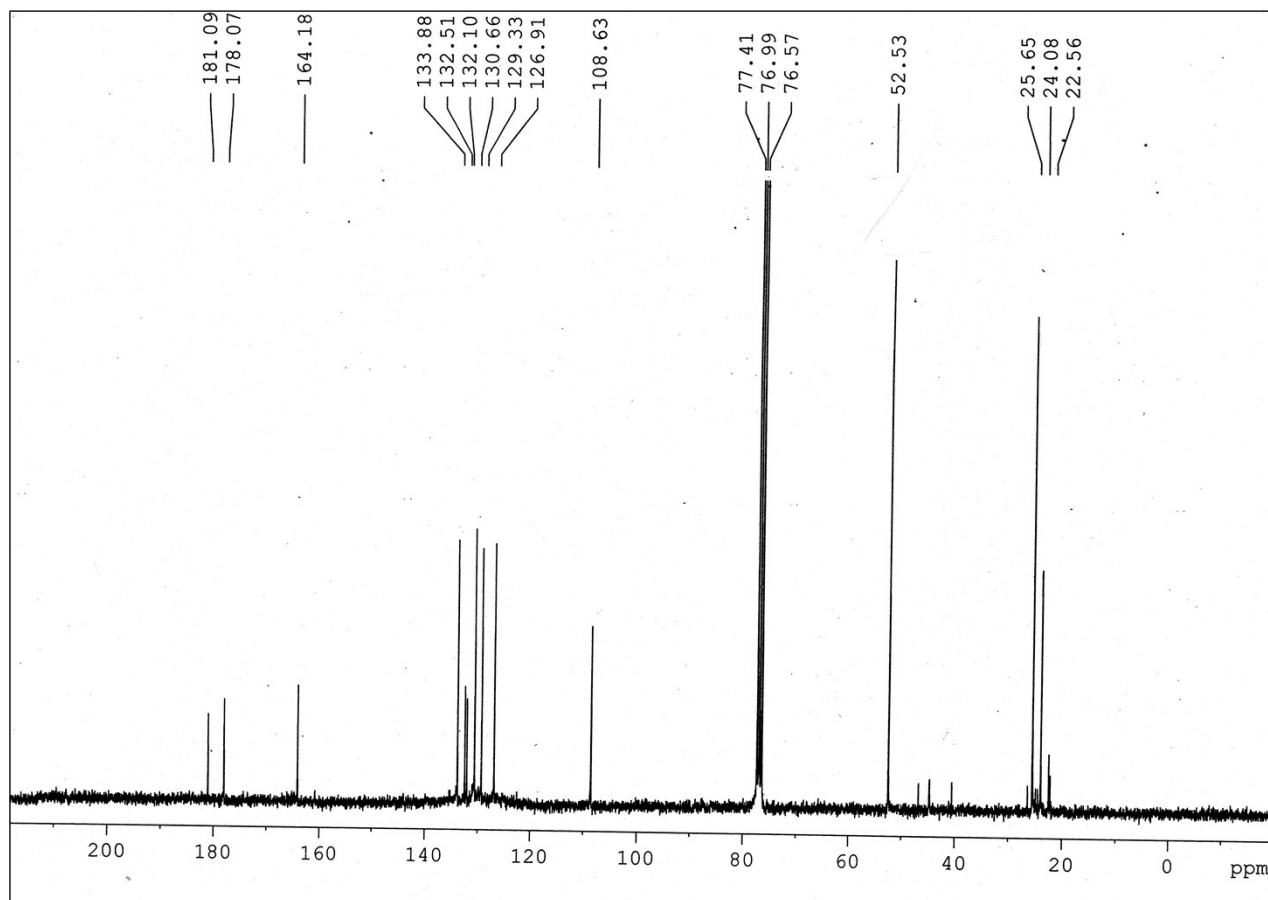

**HRMS spectra (S<sub>10</sub>) of PND+ H<sub>2</sub>S (Lower concentration):**

**HRMS (ESI-TOF):** (m/z, %): M+ Calculated for C<sub>15</sub>H<sub>17</sub>NO<sub>2</sub>S (PNDI) is 275.098. Observed: 276.1212 (M+H)<sup>+</sup>.

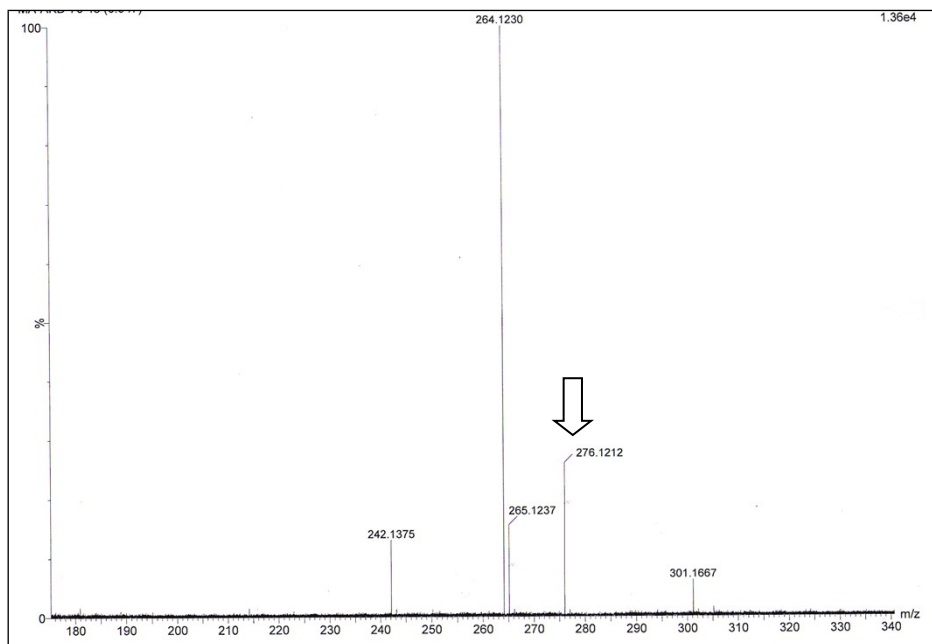

**HRMS spectra (S<sub>11</sub>) of PND+ H<sub>2</sub>S (Higher concentration):**

**HRMS (ESI-TOF):** (m/z, %): M+ Calculated for C<sub>15</sub>H<sub>17</sub>NO<sub>2</sub> (PNDH) is 243.1259. Observed: 243.1210 (M)<sup>+</sup> and 244.1292(M+H)<sup>+</sup>.

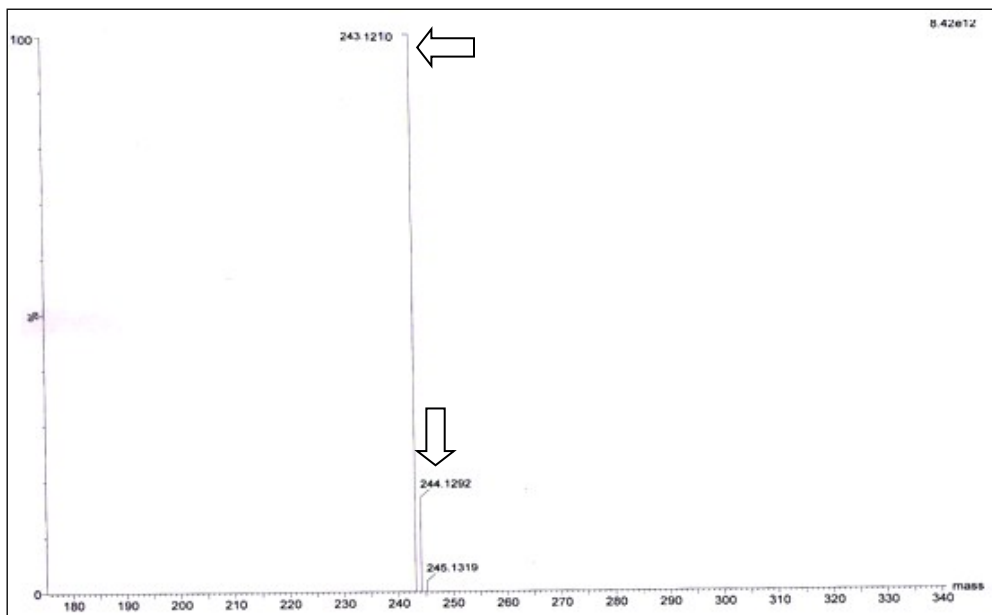

### Theoretical Study:

- All the compound was fully optimized B3LYP hybrid functional and 6-31g (d, p) basis set. All the computational studies were done in water as the solvent medium using Polarizable Continuum Model (PCM). The calculation of absorption is performed using Time Dependent Density Functional Theory (TD-DFT).
- Cartesian Coordinates 1. R (in water Phase).

#### B3LYP optimized structure

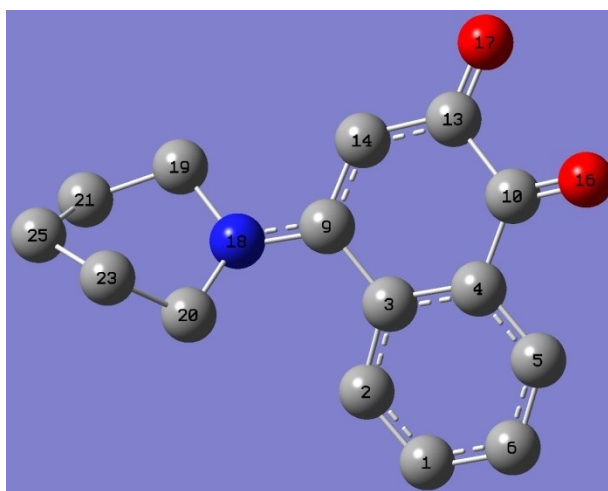

Energy (B3LYP/6-31G (d,p)) = -785.845587949 a.u.

| ATOM | Coordinates (Angstroms) |            |             |
|------|-------------------------|------------|-------------|
|      | x                       | y          | z           |
| C    | -1.56108700             | 2.96579200 | -0.52304200 |
| C    | -0.55541000             | 1.99654200 | -0.56212500 |
| C    | -0.81184700             | 0.67079000 | -0.18500500 |
| C    | -2.14516700             | 0.32690200 | 0.14367400  |
| C    | -3.14146200             | 1.30628000 | 0.19730000  |
| C    | -2.85248200             | 2.63208300 | -0.11700000 |
| H    | -1.32718900             | 3.98358500 | -0.81870100 |

|   |             |             |             |
|---|-------------|-------------|-------------|
| H | 0.42528900  | 2.28576000  | -0.91370200 |
| C | 0.23304700  | -0.39669300 | -0.22420600 |
| C | -2.54103300 | -1.09290700 | 0.31322600  |
| H | -4.14763000 | 0.99776800  | 0.46013200  |
| H | -3.63001800 | 3.38789200  | -0.07715600 |
| C | -1.51109700 | -2.16167300 | -0.09639000 |
| C | -0.16681400 | -1.72420800 | -0.30807900 |
| H | 0.56070600  | -2.51731200 | -0.41591300 |
| O | -3.64644100 | -1.42784500 | 0.71629100  |
| O | -1.87591200 | -3.34458800 | -0.13557400 |
| N | 1.55372400  | -0.05445700 | -0.25766800 |
| C | 2.54384700  | -1.08703600 | -0.62950800 |
| C | 2.10891800  | 1.11939700  | 0.46455300  |
| C | 3.92950600  | -0.47128100 | -0.81699300 |
| H | 2.20526900  | -1.55971200 | -1.55585000 |
| C | 3.29120800  | 0.69642700  | 1.34265600  |
| H | 1.32439100  | 1.55428700  | 1.08118400  |
| C | 4.45739000  | 0.14252300  | 0.49583200  |
| H | 4.60572000  | -1.24776300 | -1.18667800 |
| H | 2.94143700  | -0.05701400 | 2.05713700  |
| H | 5.00251700  | -0.61140400 | 1.07317000  |
| H | 2.58558900  | -1.87084100 | 0.14098400  |
| H | 3.87227800  | 0.29160000  | -1.60149700 |
| H | 5.17203400  | 0.93879600  | 0.26356700  |
| H | 3.60924000  | 1.56279800  | 1.93114800  |
| H | 2.43801600  | 1.88458700  | -0.24925100 |

-----

**Cartesian Coordinates 2.** Intermediate (in water Phase).

**B3LYP optimized structure**

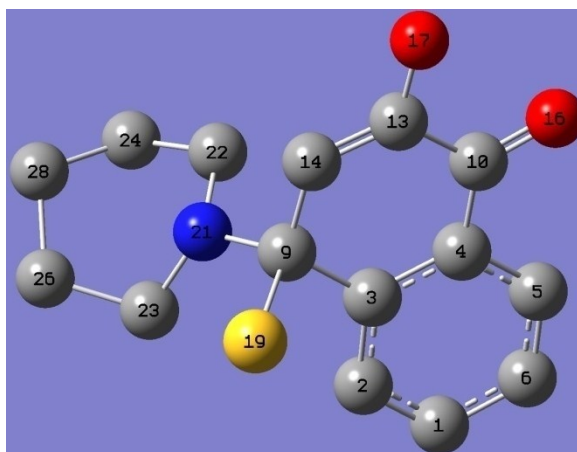

**Energy (B3LYP/6-31G(d,p)) = -1185.22866253 a.u.**

| ATOM | Coordinates (Angstroms) |             |             |
|------|-------------------------|-------------|-------------|
|      | x                       | y           | z           |
| C    | -1.42078400             | 3.11339600  | -0.24067900 |
| C    | -0.51743800             | 2.18049900  | 0.26808300  |
| C    | -0.78277100             | 0.80508100  | 0.20479800  |
| C    | -2.00903200             | 0.39639200  | -0.36538300 |
| C    | -2.91312000             | 1.34077200  | -0.87731900 |
| C    | -2.62078200             | 2.69667500  | -0.82453000 |
| H    | -1.18608100             | 4.17133200  | -0.17579400 |
| H    | 0.39401600              | 2.53556700  | 0.73071800  |
| C    | 0.24143300              | -0.22204300 | 0.71871400  |
| C    | -2.39423700             | -1.02524600 | -0.39353400 |
| H    | -3.84343900             | 0.98124900  | -1.30346500 |
| H    | -3.32088900             | 3.42496300  | -1.22074700 |
| C    | -1.45547800             | -2.00483200 | 0.18396300  |
| C    | -0.25597200             | -1.64030600 | 0.66721600  |
| H    | 0.43234400              | -2.39400800 | 1.03700900  |
| O    | -3.46066900             | -1.44463400 | -0.86054200 |

|   |             |             |             |
|---|-------------|-------------|-------------|
| O | -1.89062900 | -3.28753500 | 0.16057000  |
| H | -2.77066300 | -3.24233000 | -0.26514100 |
| S | 0.41959800  | 0.17372500  | 2.56919000  |
| H | 1.31684200  | -0.80094300 | 2.82486400  |
| N | 1.56072900  | -0.20017100 | 0.06881400  |
| C | 1.52822400  | -0.69865600 | -1.32704400 |
| C | 2.42643800  | 0.97990200  | 0.19353000  |
| C | 2.90122200  | -0.52725600 | -2.00938600 |
| H | 0.75528800  | -0.18685000 | -1.92471800 |
| C | 3.89778200  | 0.54093200  | 0.03640600  |
| H | 2.27900800  | 1.43002000  | 1.17592500  |
| C | 4.03319700  | -0.61256300 | -0.98228200 |
| H | 3.00627700  | -1.29198300 | -2.78597400 |
| H | 4.29704500  | 0.23000200  | 1.00789700  |
| H | 3.97567000  | -1.57709900 | -0.46473600 |
| H | 1.26199100  | -1.75953600 | -1.30051700 |
| H | 2.95029800  | 0.44201100  | -2.52009300 |
| H | 5.00983500  | -0.57799900 | -1.47640600 |
| H | 4.48399200  | 1.40926400  | -0.28683500 |
| H | 2.17808000  | 1.74879000  | -0.55626300 |

-----  
**Cartesian Coordinates 3. P (in water Phase).**

**B3LYP optimized structure**

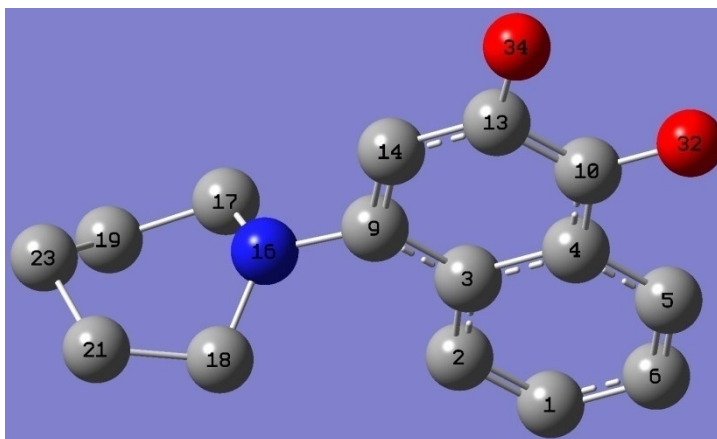

Energy (B3LYP/6-31G (d,p) ) = -787.054929946a.u.

| ATOM | Coordinates (Angstroms) |             |             |
|------|-------------------------|-------------|-------------|
|      | x                       | y           | z           |
| C    | -1.14068400             | 3.10216300  | 0.02945700  |
| C    | -0.23848100             | 2.06129700  | 0.01057300  |
| C    | -0.66932000             | 0.70469200  | 0.00776600  |
| C    | -2.08574300             | 0.45162200  | 0.01562600  |
| C    | -2.99395300             | 1.54606100  | 0.03955200  |
| C    | -2.53257800             | 2.84264100  | 0.04745100  |
| H    | -0.78353400             | 4.12772200  | 0.02982700  |
| H    | 0.82339100              | 2.27351200  | -0.00538500 |
| C    | 0.24266100              | -0.40333600 | -0.00371300 |
| C    | -2.55390600             | -0.88805100 | -0.00485600 |
| H    | -4.05818400             | 1.33799300  | 0.05024800  |
| H    | -3.23595400             | 3.66990500  | 0.06548300  |
| C    | -1.65283000             | -1.93879400 | -0.02950400 |
| C    | -0.26685300             | -1.69077400 | -0.02448100 |
| H    | 0.42934200              | -2.52496100 | -0.03180500 |
| N    | 1.66493400              | -0.25938500 | -0.01054900 |
| C    | 2.27797600              | 0.11253000  | -1.29540100 |
| C    | 2.32984800              | 0.29555200  | 1.17195900  |
| C    | 3.79544600              | 0.32106200  | -1.12658000 |

|   |             |             |             |
|---|-------------|-------------|-------------|
| H | 1.82748500  | 1.01962000  | -1.73397500 |
| C | 3.72910700  | -0.34079400 | 1.31787900  |
| H | 1.71365300  | 0.07253200  | 2.04720200  |
| C | 4.35841700  | -0.63227800 | -0.06638900 |
| H | 4.28697000  | 0.17480300  | -2.09426800 |
| H | 3.65707700  | -1.27089100 | 1.89225100  |
| H | 4.13505400  | -1.66324900 | -0.36518400 |
| H | 2.09119900  | -0.70431000 | -2.00511300 |
| H | 4.00107400  | 1.35670700  | -0.82851700 |
| H | 5.44944200  | -0.55075800 | -0.01476300 |
| H | 4.36736800  | 0.34036600  | 1.89374900  |
| H | 2.42747200  | 1.39430300  | 1.13210500  |
| O | -3.90146100 | -1.12105500 | -0.00093100 |
| H | -4.03009300 | -2.08249600 | -0.02013300 |
| O | -2.20391700 | -3.19762100 | -0.04774700 |
| H | -1.50793100 | -3.86725700 | -0.08447900 |

---



**Table S1:**

| Compound | Energy<br>(au)        | Absorption                                 |        |
|----------|-----------------------|--------------------------------------------|--------|
|          |                       | Calculated                                 | Expt.  |
| PND      | <b>-785.845587949</b> | 483.82 nm (f=0.0689)                       | 470 nm |
| PNDI     | <b>-1185.22866253</b> | 358.8 nm (f=0.085)                         | 380 nm |
| PNDH     | <b>-787.054929946</b> | 343.3 nm (f=0.0189)<br>321.47 nm (f=0.092) | 380 nm |

**References:**

1. M. Shortreed, R. Kopelman, M. Kuhn, B. Hoyland, *Anal. Chem.*, 1996, **68**, 1414. (b) W. Lin,; Yuan, L.; Cao, Z.; Feng, Y.; Long, L. *Chem. Eur. J.* 2009, **15**, 5096.(c) Zhu, M.; Yuan, M.; Liu, X.; Xu, J.; Lv, J.; Huang, C.; Liu, H.; Li, Y.; Wang, S.; Zhu, D. *Org. Lett.* 2008, **10**, 1481-1484.
